# Supplementary material for: Foreign peptide triggers boost in pneumococcal metabolism and growth
Source: PubMed Central journal article supplement (PMC5870813; doi:10.1186/s12866-018-1167-y), 2018-03-27
Supplement: 12866_2018_1167_MOESM3_ESM.pdf [file 12866_2018_1167_MOESM3_ESM.pdf]

| gene_id          | gene_short_name | locus                    | sample_1 | sample_2       | status | value_1 | value_2 | log2_fold_change | test_stat | p_value  | q_value   | signif |
|------------------|-----------------|--------------------------|----------|----------------|--------|---------|---------|------------------|-----------|----------|-----------|--------|
| gene:SpnNT_00049 | mtcA1           | Chromosome:37404-37902   | 110.58   | 110.58+peptide | OK     | 402.16  | 181.215 | -1.15007         | -2.43141  | 5.00E-05 | 0.0013612 | yes    |
| gene:SpnNT_00050 | NA              | Chromosome:37926-38742   | 110.58   | 110.58+peptide | OK     | 208.649 | 86.799  | -1.26533         | -2.72967  | 5.00E-05 | 0.0013612 | yes    |
| gene:SpnNT_00072 | purC            | Chromosome:59090-59798   | 110.58   | 110.58+peptide | OK     | 10.348  | 1.11288 | -3.21699         | -3.72326  | 5.00E-05 | 0.0013612 | yes    |
| gene:SpnNT_00073 | purL            | Chromosome:59999-63725   | 110.58   | 110.58+peptide | OK     | 17.7458 | 2.77224 | -2.67836         | -5.03976  | 5.00E-05 | 0.0013612 | yes    |
| gene:SpnNT_00074 | purF            | Chromosome:63817-65260   | 110.58   | 110.58+peptide | OK     | 16.8536 | 3.35618 | -2.32816         | -3.86726  | 5.00E-05 | 0.0013612 | yes    |
| gene:SpnNT_00075 | purM            | Chromosome:65296-66861   | 110.58   | 110.58+peptide | OK     | 20.8546 | 3.78042 | -2.46375         | -3.42677  | 5.00E-05 | 0.0013612 | yes    |
| gene:SpnNT_00078 | purH            | Chromosome:67478-69026   | 110.58   | 110.58+peptide | OK     | 44.911  | 10.4894 | -2.09814         | -4.05106  | 5.00E-05 | 0.0013612 | yes    |
| gene:SpnNT_00079 | purD            | Chromosome:69147-70410   | 110.58   | 110.58+peptide | OK     | 45.0527 | 8.84793 | -2.3482          | -4.40533  | 5.00E-05 | 0.0013612 | yes    |
| gene:SpnNT_00081 | purK            | Chromosome:70812-72379   | 110.58   | 110.58+peptide | OK     | 34.6546 | 6.52987 | -2.40792         | -3.77105  | 5.00E-05 | 0.0013612 | yes    |
| gene:SpnNT_00087 | bga             | Chromosome:79347-81608   | 110.58   | 110.58+peptide | OK     | 8.88371 | 28.9271 | 1.70319          | 2.38439   | 5.00E-05 | 0.0013612 | yes    |
| gene:SpnNT_00089 | agaC_1          | Chromosome:81635-83343   | 110.58   | 110.58+peptide | OK     | 6.69293 | 28.0236 | 2.06593          | 2.31094   | 5.00E-05 | 0.0013612 | yes    |
| gene:SpnNT_00091 | manX_1          | Chromosome:83349-83742   | 110.58   | 110.58+peptide | OK     | 9.18859 | 38.8093 | 2.07849          | 2.61476   | 5.00E-05 | 0.0013612 | yes    |
| gene:SpnNT_00092 | agaS            | Chromosome:84039-85206   | 110.58   | 110.58+peptide | OK     | 7.26321 | 30.5708 | 2.07348          | 3.3307    | 5.00E-05 | 0.0013612 | yes    |
| gene:SpnNT_00093 | lytA_1          | Chromosome:85504-86692   | 110.58   | 110.58+peptide | OK     | 6.42341 | 22.2158 | 1.79018          | 2.82361   | 5.00E-05 | 0.0013612 | yes    |
| gene:SpnNT_00099 | deoD_1          | Chromosome:96812-97577   | 110.58   | 110.58+peptide | OK     | 136.808 | 56.3856 | -1.27876         | -2.66644  | 5.00E-05 | 0.0013612 | yes    |
| gene:SpnNT_00108 | rpsD            | Chromosome:106058-106670 | 110.58   | 110.58+peptide | OK     | 1549.31 | 3497.97 | 1.17489          | 2.54089   | 5.00E-05 | 0.0013612 | yes    |
| gene:SpnNT_00112 | NA              | Chromosome:111742-112729 | 110.58   | 110.58+peptide | OK     | 412.141 | 970.812 | 1.23605          | 2.35608   | 5.00E-05 | 0.0013612 | yes    |
| gene:SpnNT_00175 | NA              | Chromosome:169980-171243 | 110.58   | 110.58+peptide | OK     | 73.5206 | 285.471 | 1.95712          | 4.02675   | 5.00E-05 | 0.0013612 | yes    |
| gene:SpnNT_00186 | mccF            | Chromosome:180722-181754 | 110.58   | 110.58+peptide | OK     | 65.9014 | 29.602  | -1.15462         | -2.38305  | 5.00E-05 | 0.0013612 | yes    |
| gene:SpnNT_00238 | NA              | Chromosome:217561-218899 | 110.58   | 110.58+peptide | OK     | 193.78  | 79.3568 | -1.288           | -2.89832  | 5.00E-05 | 0.0013612 | yes    |
| gene:SpnNT_00288 | manZ_2          | Chromosome:277000-277912 | 110.58   | 110.58+peptide | OK     | 388.93  | 918.111 | 1.23916          | 2.79625   | 5.00E-05 | 0.0013612 | yes    |
| gene:SpnNT_00289 | manY            | Chromosome:277935-278739 | 110.58   | 110.58+peptide | OK     | 248.599 | 556.784 | 1.1633           | 2.65157   | 5.00E-05 | 0.0013612 | yes    |
| gene:SpnNT_00290 | manX_2          | Chromosome:278766-279756 | 110.58   | 110.58+peptide | OK     | 248.993 | 583.152 | 1.22777          | 2.79259   | 5.00E-05 | 0.0013612 | yes    |
| gene:SpnNT_00293 | pbuO            | Chromosome:282348-283767 | 110.58   | 110.58+peptide | OK     | 151.235 | 46.415  | -1.70413         | -3.78017  | 5.00E-05 | 0.0013612 | yes    |
| gene:SpnNT_00294 | NA              | Chromosome:283819-284527 | 110.58   | 110.58+peptide | OK     | 19.2161 | 5.35942 | -1.84217         | -2.88877  | 5.00E-05 | 0.0013612 | yes    |
| gene:SpnNT_00301 | rpsI            | Chromosome:289496-289889 | 110.58   | 110.58+peptide | OK     | 2354.32 | 5131.41 | 1.12405          | 2.44871   | 5.00E-05 | 0.0013612 | yes    |
| gene:SpnNT_00332 | clpC_1          | Chromosome:316451-318557 | 110.58   | 110.58+peptide | OK     | 215.75  | 557.608 | 1.36989          | 2.46591   | 5.00E-05 | 0.0013612 | yes    |
| gene:SpnNT_00377 | alsT            | Chromosome:366821-368144 | 110.58   | 110.58+peptide | OK     | 26.1388 | 69.5722 | 1.41232          | 2.85478   | 5.00E-05 | 0.0013612 | yes    |
| gene:SpnNT_00415 | rpmB            | Chromosome:423743-423932 | 110.58   | 110.58+peptide | OK     | 4161.6  | 13394.7 | 1.68645          | 3.40749   | 5.00E-05 | 0.0013612 | yes    |
| gene:SpnNT_00466 | hrcA            | Chromosome:481476-482511 | 110.58   | 110.58+peptide | OK     | 368.212 | 944.415 | 1.35888          | 3.00978   | 5.00E-05 | 0.0013612 | yes    |
| gene:SpnNT_00467 | grpE            | Chromosome:482537-483062 | 110.58   | 110.58+peptide | OK     | 656.282 | 2919.89 | 2.15352          | 3.89856   | 5.00E-05 | 0.0013612 | yes    |
| gene:SpnNT_00573 | rplA            | Chromosome:594064-594754 | 110.58   | 110.58+peptide | OK     | 1017.05 | 2052.78 | 1.01319          | 2.22403   | 5.00E-05 | 0.0013612 | yes    |
| gene:SpnNT_00675 | NA              | Chromosome:727863-728208 | 110.58   | 110.58+peptide | OK     | 29.4116 | 101.479 | 1.78672          | 2.71493   | 5.00E-05 | 0.0013612 | yes    |
| gene:SpnNT_00689 | pyrE            | Chromosome:740845-741478 | 110.58   | 110.58+peptide | OK     | 29.4782 | 74.5554 | 1.33866          | 2.48934   | 5.00E-05 | 0.0013612 | yes    |
| gene:SpnNT_00690 | NA              | Chromosome:741710-742061 | 110.58   | 110.58+peptide | OK     | 26.3529 | 102.51  | 1.95974          | 2.98838   | 5.00E-05 | 0.0013612 | yes    |
| gene:SpnNT_00712 | pox5            | Chromosome:762226-764002 | 110.58   | 110.58+peptide | OK     | 501.471 | 1377.08 | 1.45738          | 3.07853   | 5.00E-05 | 0.0013612 | yes    |
| gene:SpnNT_00713 | NA              | Chromosome:764112-764460 | 110.58   | 110.58+peptide | OK     | 463.174 | 1456.29 | 1.65267          | 3.46962   | 5.00E-05 | 0.0013612 | yes    |
| gene:SpnNT_00732 | braC            | Chromosome:776627-777788 | 110.58   | 110.58+peptide | OK     | 152.651 | 394.455 | 1.36962          | 3.03792   | 5.00E-05 | 0.0013612 | yes    |
| gene:SpnNT_00733 | livH_1          | Chromosome:778055-778925 | 110.58   | 110.58+peptide | OK     | 47.0072 | 155.177 | 1.72296          | 3.56881   | 5.00E-05 | 0.0013612 | yes    |
| gene:SpnNT_00736 | livF            | Chromosome:778928-781359 | 110.58   | 110.58+peptide | OK     | 80.994  | 263.852 | 1.70384          | 2.22266   | 5.00E-05 | 0.0013612 | yes    |
| gene:SpnNT_00742 | mapP            | Chromosome:787672-788488 | 110.58   | 110.58+peptide | OK     | 17.2089 | 47.3627 | 1.46059          | 2.74554   | 5.00E-05 | 0.0013612 | yes    |
| gene:SpnNT_00755 | NA              | Chromosome:800842-801082 | 110.58   | 110.58+peptide | OK     | 1504.52 | 3434.57 | 1.19082          | 2.6103    | 5.00E-05 | 0.0013612 | yes    |
| gene:SpnNT_00793 | NA              | Chromosome:840349-841111 | 110.58   | 110.58+peptide | OK     | 28.1171 | 81.0592 | 1.52753          | 2.93295   | 5.00E-05 | 0.0013612 | yes    |
| gene:SpnNT_00794 | glyQ            | Chromosome:841303-842221 | 110.58   | 110.58+peptide | OK     | 56.7058 | 136.885 | 1.27139          | 2.69917   | 5.00E-05 | 0.0013612 | yes    |

|                  |         |                            |        |                |    |         |         |           |          |          |           |     |
|------------------|---------|----------------------------|--------|----------------|----|---------|---------|-----------|----------|----------|-----------|-----|
| gene:SpnNT_00795 | glyS    | Chromosome:842480-844517   | 110.58 | 110.58+peptide | OK | 71.6761 | 179.763 | 1.32653   | 2.97157  | 5.00E-05 | 0.0013612 | yes |
| gene:SpnNT_00796 | NA      | Chromosome:844558-844816   | 110.58 | 110.58+peptide | OK | 493.496 | 1763.59 | 1.83741   | 3.61296  | 5.00E-05 | 0.0013612 | yes |
| gene:SpnNT_00853 | rpsU    | Chromosome:891009-891186   | 110.58 | 110.58+peptide | OK | 5245.19 | 16486.3 | 1.6522    | 3.16128  | 5.00E-05 | 0.0013612 | yes |
| gene:SpnNT_00873 | glnH_2  | Chromosome:907827-908643   | 110.58 | 110.58+peptide | OK | 431.854 | 163.028 | -1.40542  | -3.13879 | 5.00E-05 | 0.0013612 | yes |
| gene:SpnNT_00883 | alaS    | Chromosome:917808-920427   | 110.58 | 110.58+peptide | OK | 69.1295 | 150.043 | 1.118     | 2.52603  | 5.00E-05 | 0.0013612 | yes |
| gene:SpnNT_00910 | rplJ    | Chromosome:951105-951606   | 110.58 | 110.58+peptide | OK | 330.379 | 961.294 | 1.54086   | 3.4987   | 5.00E-05 | 0.0013612 | yes |
| gene:SpnNT_00911 | rplL    | Chromosome:951681-952186   | 110.58 | 110.58+peptide | OK | 1743.95 | 4822.11 | 1.46731   | 3.09817  | 5.00E-05 | 0.0013612 | yes |
| gene:SpnNT_00992 | gdhA    | Chromosome:1022113-1023460 | 110.58 | 110.58+peptide | OK | 480.103 | 1679.11 | 1.80629   | 3.7587   | 5.00E-05 | 0.0013612 | yes |
| gene:SpnNT_01021 | pyrP    | Chromosome:1044618-1045902 | 110.58 | 110.58+peptide | OK | 48.1634 | 205.416 | 2.09254   | 4.59883  | 5.00E-05 | 0.0013612 | yes |
| gene:SpnNT_01032 | pyrR    | Chromosome:1056577-1057099 | 110.58 | 110.58+peptide | OK | 43.4849 | 169.244 | 1.96052   | 3.83957  | 5.00E-05 | 0.0013612 | yes |
| gene:SpnNT_01033 | pyrB    | Chromosome:1057117-1058041 | 110.58 | 110.58+peptide | OK | 54.8878 | 205.724 | 1.90615   | 4.10718  | 5.00E-05 | 0.0013612 | yes |
| gene:SpnNT_01034 | carA    | Chromosome:1058090-1059170 | 110.58 | 110.58+peptide | OK | 51.7615 | 183.712 | 1.82749   | 3.9601   | 5.00E-05 | 0.0013612 | yes |
| gene:SpnNT_01035 | carB    | Chromosome:1059482-1062659 | 110.58 | 110.58+peptide | OK | 51.943  | 175.052 | 1.75278   | 3.9137   | 5.00E-05 | 0.0013612 | yes |
| gene:SpnNT_01079 | fhS1    | Chromosome:1108271-1109942 | 110.58 | 110.58+peptide | OK | 167.968 | 45.4634 | -1.88541  | -4.1678  | 5.00E-05 | 0.0013612 | yes |
| gene:SpnNT_01185 | NA      | Chromosome:1224162-1224507 | 110.58 | 110.58+peptide | OK | 489.216 | 1127.88 | 1.20507   | 2.70217  | 5.00E-05 | 0.0013612 | yes |
| gene:SpnNT_01186 | rplU    | Chromosome:1224522-1224837 | 110.58 | 110.58+peptide | OK | 497.099 | 1133.64 | 1.18935   | 2.62461  | 5.00E-05 | 0.0013612 | yes |
| gene:SpnNT_01255 | queT    | Chromosome:1293058-1293568 | 110.58 | 110.58+peptide | OK | 76.3541 | 261.646 | 1.77684   | 3.71331  | 5.00E-05 | 0.0013612 | yes |
| gene:SpnNT_01258 | hemH    | Chromosome:1294622-1295717 | 110.58 | 110.58+peptide | OK | 8.01384 | 27.9902 | 1.80436   | 3.03475  | 5.00E-05 | 0.0013612 | yes |
| gene:SpnNT_01267 | yhdG    | Chromosome:1307718-1309110 | 110.58 | 110.58+peptide | OK | 151.693 | 76.7204 | -0.983471 | -2.18349 | 5.00E-05 | 0.0013612 | yes |
| gene:SpnNT_01289 | NA      | Chromosome:1324644-1325358 | 110.58 | 110.58+peptide | OK | 15.3587 | 44.1889 | 1.52463   | 2.75464  | 5.00E-05 | 0.0013612 | yes |
| gene:SpnNT_01290 | pepF1_1 | Chromosome:1325359-1327162 | 110.58 | 110.58+peptide | OK | 28.1247 | 73.9095 | 1.39392   | 3.05388  | 5.00E-05 | 0.0013612 | yes |
| gene:SpnNT_01295 | NA      | Chromosome:1331968-1332202 | 110.58 | 110.58+peptide | OK | 4956.51 | 10543.4 | 1.08894   | 2.23333  | 5.00E-05 | 0.0013612 | yes |
| gene:SpnNT_01308 | rplT    | Chromosome:1345184-1345544 | 110.58 | 110.58+peptide | OK | 2149.68 | 4917.87 | 1.19391   | 2.5585   | 5.00E-05 | 0.0013612 | yes |
| gene:SpnNT_01310 | infC    | Chromosome:1345828-1346416 | 110.58 | 110.58+peptide | OK | 185.44  | 499.628 | 1.4299    | 3.22458  | 5.00E-05 | 0.0013612 | yes |
| gene:SpnNT_01352 | ydaF_5  | Chromosome:1391460-1392030 | 110.58 | 110.58+peptide | OK | 162.249 | 67.4202 | -1.26696  | -2.58771 | 5.00E-05 | 0.0013612 | yes |
| gene:SpnNT_01391 | NA      | Chromosome:1428017-1428713 | 110.58 | 110.58+peptide | OK | 77.9114 | 21.3319 | -1.86882  | -3.32339 | 5.00E-05 | 0.0013612 | yes |
| gene:SpnNT_01474 | rpsT    | Chromosome:1510832-1511069 | 110.58 | 110.58+peptide | OK | 2626.2  | 6286.19 | 1.25921   | 2.79228  | 5.00E-05 | 0.0013612 | yes |
| gene:SpnNT_01507 | fliY    | Chromosome:1542792-1543629 | 110.58 | 110.58+peptide | OK | 366.202 | 118.564 | -1.62698  | -3.66647 | 5.00E-05 | 0.0013612 | yes |
| gene:SpnNT_01508 | glnQ_3  | Chromosome:1543641-1544271 | 110.58 | 110.58+peptide | OK | 288.811 | 83.7272 | -1.78636  | -3.8098  | 5.00E-05 | 0.0013612 | yes |
| gene:SpnNT_01509 | yecS_2  | Chromosome:1544280-1544922 | 110.58 | 110.58+peptide | OK | 211.6   | 51.9972 | -2.02483  | -4.14391 | 5.00E-05 | 0.0013612 | yes |
| gene:SpnNT_01532 | lmrA    | Chromosome:1568158-1569589 | 110.58 | 110.58+peptide | OK | 200.835 | 51.7142 | -1.95738  | -4.24422 | 5.00E-05 | 0.0013612 | yes |
| gene:SpnNT_01534 | sarA_5  | Chromosome:1570011-1571970 | 110.58 | 110.58+peptide | OK | 1132.49 | 437.484 | -1.37219  | -2.85131 | 5.00E-05 | 0.0013612 | yes |
| gene:SpnNT_01537 | NA      | Chromosome:1575387-1575585 | 110.58 | 110.58+peptide | OK | 2068.24 | 9578.11 | 2.21134   | 3.68634  | 5.00E-05 | 0.0013612 | yes |
| gene:SpnNT_01548 | rpsR    | Chromosome:1582275-1582515 | 110.58 | 110.58+peptide | OK | 2010.07 | 4559.14 | 1.18151   | 2.61354  | 5.00E-05 | 0.0013612 | yes |
| gene:SpnNT_01549 | ssb_1   | Chromosome:1582546-1583017 | 110.58 | 110.58+peptide | OK | 736.644 | 1989.34 | 1.43325   | 3.11065  | 5.00E-05 | 0.0013612 | yes |
| gene:SpnNT_01550 | rpsF    | Chromosome:1583028-1583319 | 110.58 | 110.58+peptide | OK | 1032.11 | 3008.46 | 1.54343   | 3.32732  | 5.00E-05 | 0.0013612 | yes |
| gene:SpnNT_01660 | yhjX    | Chromosome:1663456-1664683 | 110.58 | 110.58+peptide | OK | 91.0081 | 26.1712 | -1.79801  | -3.80155 | 5.00E-05 | 0.0013612 | yes |
| gene:SpnNT_01689 | thrS    | Chromosome:1689816-1691760 | 110.58 | 110.58+peptide | OK | 46.9044 | 117.489 | 1.32473   | 2.98323  | 5.00E-05 | 0.0013612 | yes |
| gene:SpnNT_01732 | bgIK_1  | Chromosome:1740306-1741191 | 110.58 | 110.58+peptide | OK | 43.7883 | 159.813 | 1.86777   | 3.69834  | 5.00E-05 | 0.0013612 | yes |
| gene:SpnNT_01733 | nanA_2  | Chromosome:1741208-1742126 | 110.58 | 110.58+peptide | OK | 27.6617 | 70.0052 | 1.33957   | 2.62798  | 5.00E-05 | 0.0013612 | yes |
| gene:SpnNT_01734 | NA      | Chromosome:1742294-1742939 | 110.58 | 110.58+peptide | OK | 11.3009 | 37.4874 | 1.72997   | 2.75727  | 5.00E-05 | 0.0013612 | yes |
| gene:SpnNT_01735 | NA      | Chromosome:1743225-1743570 | 110.58 | 110.58+peptide | OK | 20.4733 | 70.6763 | 1.78748   | 2.54165  | 5.00E-05 | 0.0013612 | yes |
| gene:SpnNT_01736 | araQ_2  | Chromosome:1743629-1744469 | 110.58 | 110.58+peptide | OK | 17.266  | 44.7436 | 1.37375   | 2.46417  | 5.00E-05 | 0.0013612 | yes |
| gene:SpnNT_01737 | lacF_2  | Chromosome:1744484-1745372 | 110.58 | 110.58+peptide | OK | 16.4568 | 44.2138 | 1.42581   | 2.5639   | 5.00E-05 | 0.0013612 | yes |
| gene:SpnNT_01738 | yesO_1  | Chromosome:1745602-1746931 | 110.58 | 110.58+peptide | OK | 52.5236 | 334.428 | 2.67066   | 4.69466  | 5.00E-05 | 0.0013612 | yes |

|                  |             |                            |        |                |    |         |         |           |          |          |            |     |
|------------------|-------------|----------------------------|--------|----------------|----|---------|---------|-----------|----------|----------|------------|-----|
| gene:SpnNT_01741 | nanE        | Chromosome:1747995-1748694 | 110.58 | 110.58+peptide | OK | 46.5412 | 129.382 | 1.47506   | 2.7862   | 5.00E-05 | 0.0013612  | yes |
| gene:SpnNT_01742 | afr         | Chromosome:1748866-1749970 | 110.58 | 110.58+peptide | OK | 13.1615 | 267.059 | 4.34277   | 6.67757  | 5.00E-05 | 0.0013612  | yes |
| gene:SpnNT_01743 | nanB        | Chromosome:1749981-1752075 | 110.58 | 110.58+peptide | OK | 7.6902  | 92.0018 | 3.58057   | 5.63211  | 5.00E-05 | 0.0013612  | yes |
| gene:SpnNT_01744 | ycjP        | Chromosome:1752092-1753810 | 110.58 | 110.58+peptide | OK | 10.3001 | 77.8059 | 2.91723   | 3.02256  | 5.00E-05 | 0.0013612  | yes |
| gene:SpnNT_01745 | ycjO        | Chromosome:1752092-1753810 | 110.58 | 110.58+peptide | OK | 11.848  | 89.9142 | 2.9239    | 3.45167  | 5.00E-05 | 0.0013612  | yes |
| gene:SpnNT_01746 | yesO_2      | Chromosome:1753888-1755226 | 110.58 | 110.58+peptide | OK | 14.8111 | 150.936 | 3.3492    | 5.26966  | 5.00E-05 | 0.0013612  | yes |
| gene:SpnNT_01747 | tabA        | Chromosome:1755244-1755697 | 110.58 | 110.58+peptide | OK | 13.3745 | 84.2924 | 2.65592   | 3.71246  | 5.00E-05 | 0.0013612  | yes |
| gene:SpnNT_01751 | nanA_3      | Chromosome:1762152-1763166 | 110.58 | 110.58+peptide | OK | 21.0527 | 113.375 | 2.42902   | 4.08935  | 5.00E-05 | 0.0013612  | yes |
| gene:SpnNT_01752 | nanA_4      | Chromosome:1763233-1765036 | 110.58 | 110.58+peptide | OK | 18.6605 | 66.5538 | 1.83453   | 3.39752  | 5.00E-05 | 0.0013612  | yes |
| gene:SpnNT_01761 | NA          | Chromosome:1775846-1776134 | 110.58 | 110.58+peptide | OK | 37.8374 | 123.277 | 1.70402   | 2.45386  | 5.00E-05 | 0.0013612  | yes |
| gene:SpnNT_01840 | NA          | Chromosome:1847981-1849238 | 110.58 | 110.58+peptide | OK | 8.91383 | 21.1463 | 1.24629   | 2.28095  | 5.00E-05 | 0.0013612  | yes |
| gene:SpnNT_01866 | NA          | Chromosome:1871092-1871752 | 110.58 | 110.58+peptide | OK | 9.45289 | 31.1104 | 1.71857   | 2.72946  | 5.00E-05 | 0.0013612  | yes |
| gene:SpnNT_01884 | paal        | Chromosome:1891709-1892114 | 110.58 | 110.58+peptide | OK | 55.8486 | 139.188 | 1.31744   | 2.41864  | 5.00E-05 | 0.0013612  | yes |
| gene:SpnNT_02014 | asnA        | Chromosome:2003362-2004355 | 110.58 | 110.58+peptide | OK | 875.789 | 400.932 | -1.12722  | -2.54235 | 5.00E-05 | 0.0013612  | yes |
| gene:SpnNT_02080 | adhE        | Chromosome:2056744-2059396 | 110.58 | 110.58+peptide | OK | 140.1   | 576.489 | 2.04084   | 3.73814  | 5.00E-05 | 0.0013612  | yes |
| gene:SpnNT_02191 | malX_2      | Chromosome:2158441-2159713 | 110.58 | 110.58+peptide | OK | 46.9078 | 109.266 | 1.21994   | 2.6541   | 5.00E-05 | 0.0013612  | yes |
| gene:SpnNT_02277 | NA          | Chromosome:2250554-2251103 | 110.58 | 110.58+peptide | OK | 672.631 | 2404.55 | 1.83788   | 3.49749  | 5.00E-05 | 0.0013612  | yes |
| gene:SpnNT_02285 | tsf         | Chromosome:2256639-2257680 | 110.58 | 110.58+peptide | OK | 1013.59 | 2137.71 | 1.07659   | 2.3306   | 5.00E-05 | 0.0013612  | yes |
| gene:SpnNT_00882 | NA          | Chromosome:917301-917787   | 110.58 | 110.58+peptide | OK | 24.0687 | 61.3143 | 1.34907   | 2.37662  | 1.00E-04 | 0.0025332  | yes |
| gene:SpnNT_00909 | mtaD        | Chromosome:949389-950856   | 110.58 | 110.58+peptide | OK | 158.001 | 77.8727 | -1.02075  | -2.33226 | 1.00E-04 | 0.0025332  | yes |
| gene:SpnNT_01184 | rpmA        | Chromosome:1223852-1224146 | 110.58 | 110.58+peptide | OK | 4293.04 | 9441.48 | 1.13701   | 2.16613  | 1.00E-04 | 0.0025332  | yes |
| gene:SpnNT_01677 | galE_1      | Chromosome:1677661-1679648 | 110.58 | 110.58+peptide | OK | 460.32  | 214.207 | -1.10363  | -2.26399 | 1.00E-04 | 0.0025332  | yes |
| gene:SpnNT_01740 | malX_1      | Chromosome:1747055-1747977 | 110.58 | 110.58+peptide | OK | 37.3784 | 104.784 | 1.48714   | 2.1965   | 1.00E-04 | 0.0025332  | yes |
| gene:SpnNT_01858 | trpE        | Chromosome:1861563-1863488 | 110.58 | 110.58+peptide | OK | 40.9494 | 16.219  | -1.33616  | -2.35026 | 1.00E-04 | 0.0025332  | yes |
| gene:SpnNT_02242 | NA          | Chromosome:2211026-2211926 | 110.58 | 110.58+peptide | OK | 903.499 | 423.261 | -1.09398  | -2.44296 | 1.00E-04 | 0.0025332  | yes |
| gene:SpnNT_00180 | ribBA       | Chromosome:175396-176602   | 110.58 | 110.58+peptide | OK | 17.7309 | 39.3466 | 1.14997   | 2.23849  | 0.00015  | 0.00355289 | yes |
| gene:SpnNT_00734 | livH_2      | Chromosome:778928-781359   | 110.58 | 110.58+peptide | OK | 50.1429 | 171.942 | 1.77781   | 2.25877  | 0.00015  | 0.00355289 | yes |
| gene:SpnNT_01483 | rpiA        | Chromosome:1518271-1518955 | 110.58 | 110.58+peptide | OK | 79.9838 | 161.506 | 1.01381   | 2.18373  | 0.00015  | 0.00355289 | yes |
| gene:SpnNT_02256 | NA          | Chromosome:2227043-2228453 | 110.58 | 110.58+peptide | OK | 16.1381 | 36.3938 | 1.17322   | 2.30989  | 0.00015  | 0.00355289 | yes |
| gene:SpnNT_01107 | NA          | Chromosome:1134891-1135368 | 110.58 | 110.58+peptide | OK | 7.74417 | 22.5453 | 1.54165   | 2.0868   | 2.00E-04 | 0.00450928 | yes |
| gene:SpnNT_02299 | recF        | Chromosome:2270375-2271473 | 110.58 | 110.58+peptide | OK | 27.5876 | 56.684  | 1.03892   | 2.12214  | 2.00E-04 | 0.00450928 | yes |
| gene:SpnNT_01109 | gatC_2      | Chromosome:1135759-1136158 | 110.58 | 110.58+peptide | OK | 6.21124 | 20.9831 | 1.75628   | 2.24944  | 0.00025  | 0.00542231 | yes |
| gene:SpnNT_01307 | gloA        | Chromosome:1344745-1345126 | 110.58 | 110.58+peptide | OK | 686.521 | 1352.23 | 0.977968  | 2.05785  | 0.00025  | 0.00542231 | yes |
| gene:SpnNT_01762 | ytrB        | Chromosome:1776144-1776795 | 110.58 | 110.58+peptide | OK | 18.7608 | 44.0443 | 1.23123   | 2.11285  | 0.00025  | 0.00542231 | yes |
| gene:SpnNT_01944 | SpnNT_01944 | Chromosome:1942830-1942914 | 110.58 | 110.58+peptide | OK | 3648.18 | 16616.8 | 2.18739   | 2.47626  | 0.00025  | 0.00542231 | yes |
| gene:SpnNT_00090 | manZ_1      | Chromosome:81635-83343     | 110.58 | 110.58+peptide | OK | 8.43764 | 31.8994 | 1.91862   | 2.22249  | 3.00E-04 | 0.00631878 | yes |
| gene:SpnNT_00409 | gutB        | Chromosome:416594-417638   | 110.58 | 110.58+peptide | OK | 15.5773 | 32.0804 | 1.04225   | 1.97382  | 3.00E-04 | 0.00631878 | yes |
| gene:SpnNT_00737 | NA          | Chromosome:781666-782323   | 110.58 | 110.58+peptide | OK | 49.8849 | 107.722 | 1.11064   | 2.26881  | 3.00E-04 | 0.00631878 | yes |
| gene:SpnNT_01174 | gapN        | Chromosome:1206672-1210242 | 110.58 | 110.58+peptide | OK | 227.797 | 71.7947 | -1.6658   | -2.18888 | 3.00E-04 | 0.00631878 | yes |
| gene:SpnNT_01865 | NA          | Chromosome:1870000-1871068 | 110.58 | 110.58+peptide | OK | 10.0907 | 23.5938 | 1.22537   | 2.18541  | 3.00E-04 | 0.00631878 | yes |
| gene:SpnNT_00572 | rplK        | Chromosome:593430-593856   | 110.58 | 110.58+peptide | OK | 575.984 | 1080.78 | 0.907976  | 2.08136  | 0.00035  | 0.00717609 | yes |
| gene:SpnNT_00697 | NA          | Chromosome:747790-748927   | 110.58 | 110.58+peptide | OK | 469.544 | 916.696 | 0.965184  | 2.12487  | 0.00035  | 0.00717609 | yes |
| gene:SpnNT_01056 | mcrB        | Chromosome:1081545-1084780 | 110.58 | 110.58+peptide | OK | 17.7517 | 6.37854 | -1.47666  | -2.15732 | 0.00035  | 0.00717609 | yes |
| gene:SpnNT_01340 | lytB_5      | Chromosome:1381240-1383175 | 110.58 | 110.58+peptide | OK | 77.5008 | 40.8185 | -0.924989 | -2.06277 | 0.00035  | 0.00717609 | yes |
| gene:SpnNT_01482 | deoB        | Chromosome:1517046-1518258 | 110.58 | 110.58+peptide | OK | 75.4671 | 143.151 | 0.923618  | 2.09084  | 4.00E-04 | 0.00811252 | yes |

|                  |           |                            |        |                |    |         |         |           |          |          |            |     |
|------------------|-----------|----------------------------|--------|----------------|----|---------|---------|-----------|----------|----------|------------|-----|
| gene:SpnNT_02298 | NA        | Chromosome:2270004-2270373 | 110.58 | 110.58+peptide | OK | 70.2538 | 155.59  | 1.1471    | 2.1542   | 4.00E-04 | 0.00811252 | yes |
| gene:SpnNT_00208 | rplC      | Chromosome:202823-203450   | 110.58 | 110.58+peptide | OK | 576.013 | 1087.21 | 0.916459  | 2.06158  | 0.00045  | 0.00885292 | yes |
| gene:SpnNT_00236 | rplQ      | Chromosome:216634-217021   | 110.58 | 110.58+peptide | OK | 1420.94 | 2667.74 | 0.908765  | 2.03415  | 0.00045  | 0.00885292 | yes |
| gene:SpnNT_00688 | pyrF      | Chromosome:740110-740812   | 110.58 | 110.58+peptide | OK | 21.8499 | 48.9777 | 1.1645    | 2.14871  | 0.00045  | 0.00885292 | yes |
| gene:SpnNT_00747 | sodA      | Chromosome:794107-794713   | 110.58 | 110.58+peptide | OK | 782.562 | 1477.46 | 0.916841  | 2.04824  | 0.00045  | 0.00885292 | yes |
| gene:SpnNT_01006 | rplS      | Chromosome:1031622-1031970 | 110.58 | 110.58+peptide | OK | 2100.75 | 4044.99 | 0.945235  | 2.13139  | 0.00045  | 0.00885292 | yes |
| gene:SpnNT_01116 | NA        | Chromosome:1141691-1142309 | 110.58 | 110.58+peptide | OK | 191.292 | 365.159 | 0.932749  | 2.06644  | 0.00045  | 0.00885292 | yes |
| gene:SpnNT_01476 | deoD_2    | Chromosome:1511668-1512379 | 110.58 | 110.58+peptide | OK | 80.9349 | 157.402 | 0.959625  | 2.05173  | 0.00045  | 0.00885292 | yes |
| gene:SpnNT_01717 | ileS      | Chromosome:1723429-1726222 | 110.58 | 110.58+peptide | OK | 62.1887 | 116.391 | 0.904253  | 2.06143  | 0.00045  | 0.00885292 | yes |
| gene:SpnNT_00080 | purE      | Chromosome:70812-72379     | 110.58 | 110.58+peptide | OK | 39.2474 | 7.45245 | -2.39681  | -2.23309 | 5.00E-04 | 0.0095781  | yes |
| gene:SpnNT_00227 | rpmD      | Chromosome:211505-211688   | 110.58 | 110.58+peptide | OK | 2079.09 | 4116.71 | 0.985541  | 2.08471  | 5.00E-04 | 0.0095781  | yes |
| gene:SpnNT_00468 | dnaK      | Chromosome:483541-485365   | 110.58 | 110.58+peptide | OK | 509.029 | 977.915 | 0.941962  | 2.02434  | 5.00E-04 | 0.0095781  | yes |
| gene:SpnNT_01648 | dps       | Chromosome:1651393-1651912 | 110.58 | 110.58+peptide | OK | 1788.5  | 893.843 | -1.00066  | -2.16178 | 5.00E-04 | 0.0095781  | yes |
| gene:SpnNT_01913 | NA        | Chromosome:1917497-1917746 | 110.58 | 110.58+peptide | OK | 1105.71 | 2173.53 | 0.975068  | 2.02762  | 5.00E-04 | 0.0095781  | yes |
| gene:SpnNT_01126 | ptsH      | Chromosome:1152548-1152812 | 110.58 | 110.58+peptide | OK | 2470.72 | 4742.86 | 0.940824  | 1.98734  | 0.00055  | 0.0103545  | yes |
| gene:SpnNT_01506 | NA        | Chromosome:1542167-1542515 | 110.58 | 110.58+peptide | OK | 975.316 | 505.705 | -0.947575 | -2.01389 | 0.00055  | 0.0103545  | yes |
| gene:SpnNT_00741 | ptsG_1    | Chromosome:785440-787621   | 110.58 | 110.58+peptide | OK | 126.397 | 230.823 | 0.868826  | 1.98367  | 6.00E-04 | 0.0111203  | yes |
| gene:SpnNT_01424 | NA        | Chromosome:1463857-1464598 | 110.58 | 110.58+peptide | OK | 23.5461 | 49.6505 | 1.07632   | 2.02965  | 6.00E-04 | 0.0111203  | yes |
| gene:SpnNT_00179 | ribH      | Chromosome:174928-175396   | 110.58 | 110.58+peptide | OK | 23.3309 | 54.833  | 1.2328    | 2.11014  | 0.00065  | 0.0118958  | yes |
| gene:SpnNT_01098 | udk       | Chromosome:1125772-1126411 | 110.58 | 110.58+peptide | OK | 177.633 | 331.094 | 0.898342  | 1.99623  | 0.00065  | 0.0118958  | yes |
| gene:SpnNT_01218 | NA        | Chromosome:1251675-1252005 | 110.58 | 110.58+peptide | OK | 376.057 | 721.575 | 0.940196  | 1.97871  | 0.00065  | 0.0118958  | yes |
| gene:SpnNT_01859 | NA        | Chromosome:1863859-1864291 | 110.58 | 110.58+peptide | OK | 494.895 | 262.837 | -0.912956 | -1.97531 | 0.00065  | 0.0118958  | yes |
| gene:SpnNT_00300 | rplM      | Chromosome:289030-289477   | 110.58 | 110.58+peptide | OK | 500.827 | 897.461 | 0.841539  | 1.92007  | 0.00075  | 0.0133173  | yes |
| gene:SpnNT_01654 | rebM      | Chromosome:1657217-1657976 | 110.58 | 110.58+peptide | OK | 54.1741 | 109.599 | 1.01657   | 1.95549  | 0.00075  | 0.0133173  | yes |
| gene:SpnNT_02220 | rpmF      | Chromosome:2186953-2187136 | 110.58 | 110.58+peptide | OK | 317.142 | 706.736 | 1.15604   | 1.97685  | 0.00075  | 0.0133173  | yes |
| gene:SpnNT_02286 | rpsB      | Chromosome:2257758-2258538 | 110.58 | 110.58+peptide | OK | 1486.16 | 2779.98 | 0.903485  | 1.93744  | 0.00075  | 0.0133173  | yes |
| gene:SpnNT_01172 | glgA      | Chromosome:1206672-1210242 | 110.58 | 110.58+peptide | OK | 230.259 | 84.6431 | -1.4438   | -2.02289 | 8.00E-04 | 0.0140342  | yes |
| gene:SpnNT_01192 | pta       | Chromosome:1228170-1229145 | 110.58 | 110.58+peptide | OK | 54.4825 | 102.776 | 0.915638  | 1.98181  | 8.00E-04 | 0.0140342  | yes |
| gene:SpnNT_02041 | ccpA_2    | Chromosome:2028345-2029356 | 110.58 | 110.58+peptide | OK | 343.194 | 626.226 | 0.867661  | 1.93744  | 0.00085  | 0.0148124  | yes |
| gene:SpnNT_00207 | rpsJ      | Chromosome:202298-202607   | 110.58 | 110.58+peptide | OK | 754.256 | 1362.39 | 0.853012  | 1.88489  | 9.00E-04 | 0.0154579  | yes |
| gene:SpnNT_00449 | pyrG      | Chromosome:458614-460222   | 110.58 | 110.58+peptide | OK | 57.6678 | 106.3   | 0.882307  | 1.96976  | 0.001    | 0.0168447  | yes |
| gene:SpnNT_00800 | NA        | Chromosome:848077-849457   | 110.58 | 110.58+peptide | OK | 298.017 | 543.081 | 0.865771  | 1.92993  | 0.00105  | 0.0174849  | yes |
| gene:SpnNT_01862 | NA        | Chromosome:1866471-1867182 | 110.58 | 110.58+peptide | OK | 13.5395 | 29.2577 | 1.11164   | 1.92002  | 0.00105  | 0.0174849  | yes |
| gene:SpnNT_01309 | rplM      | Chromosome:1345595-1345796 | 110.58 | 110.58+peptide | OK | 259.59  | 546.813 | 1.07481   | 1.86226  | 0.0011   | 0.0181562  | yes |
| gene:SpnNT_00174 | NA        | Chromosome:169217-169688   | 110.58 | 110.58+peptide | OK | 189.46  | 101.032 | -0.907079 | -1.84816 | 0.00115  | 0.0187457  | yes |
| gene:SpnNT_00235 | rpoA      | Chromosome:215687-216623   | 110.58 | 110.58+peptide | OK | 733.176 | 1300.51 | 0.826841  | 1.82859  | 0.00115  | 0.0187457  | yes |
| gene:SpnNT_02178 | ykuR      | Chromosome:2139388-2140519 | 110.58 | 110.58+peptide | OK | 242.179 | 133.936 | -0.85453  | -1.91636 | 0.0012   | 0.0193683  | yes |
| gene:SpnNT_01425 | axe1-6A_2 | Chromosome:1464619-1465444 | 110.58 | 110.58+peptide | OK | 30.3663 | 61.1156 | 1.00907   | 1.96038  | 0.00125  | 0.0201258  | yes |
| gene:SpnNT_00684 | thiF      | Chromosome:735263-737628   | 110.58 | 110.58+peptide | OK | 26.4662 | 58.4142 | 1.14217   | 1.96431  | 0.0013   | 0.020854   | yes |
| gene:SpnNT_00137 | NA        | Chromosome:133970-134105   | 110.58 | 110.58+peptide | OK | 24.4409 | 0       | #NAME? NA |          | 0.00135  | 0.021343   | yes |
| gene:SpnNT_00694 | yxjF_1    | Chromosome:743676-745025   | 110.58 | 110.58+peptide | OK | 15.3044 | 37.8852 | 1.30769   | 1.91586  | 0.00145  | 0.0226781  | yes |
| gene:SpnNT_01880 | pucK      | Chromosome:1887119-1888963 | 110.58 | 110.58+peptide | OK | 10.8195 | 4.64346 | -1.22036  | -1.88958 | 0.00145  | 0.0226781  | yes |
| gene:SpnNT_02221 | rpmGA     | Chromosome:2187151-2187301 | 110.58 | 110.58+peptide | OK | 208.13  | 541.849 | 1.38041   | 1.87796  | 0.00145  | 0.0226781  | yes |
| gene:SpnNT_01684 | rpsO      | Chromosome:1687526-1687796 | 110.58 | 110.58+peptide | OK | 5457.84 | 9902.81 | 0.859508  | 1.85008  | 0.0015   | 0.0233488  | yes |
| gene:SpnNT_01962 | NA        | Chromosome:1955823-1956108 | 110.58 | 110.58+peptide | OK | 448.371 | 821.581 | 0.873711  | 1.78491  | 0.0015   | 0.0233488  | yes |

|                  |             |                            |        |                |    |         |         |           |          |         |           |     |
|------------------|-------------|----------------------------|--------|----------------|----|---------|---------|-----------|----------|---------|-----------|-----|
| gene:SpnNT_00076 | purN        | Chromosome:65296-66861     | 110.58 | 110.58+peptide | OK | 19.9024 | 4.39661 | -2.17848  | -1.97865 | 0.0017  | 0.025969  | yes |
| gene:SpnNT_00211 | rplB        | Chromosome:204411-205245   | 110.58 | 110.58+peptide | OK | 811.342 | 1469.84 | 0.857275  | 1.84142  | 0.0017  | 0.025969  | yes |
| gene:SpnNT_00676 | NA          | Chromosome:728290-730312   | 110.58 | 110.58+peptide | OK | 7.17119 | 14.287  | 0.994417  | 1.7811   | 0.00175 | 0.0265167 | yes |
| gene:SpnNT_01220 | dnaG        | Chromosome:1253130-1254891 | 110.58 | 110.58+peptide | OK | 82.7642 | 141.719 | 0.775955  | 1.78736  | 0.0018  | 0.0270557 | yes |
| gene:SpnNT_02300 | guaB        | Chromosome:2271523-2273002 | 110.58 | 110.58+peptide | OK | 436.452 | 251.856 | -0.793223 | -1.78501 | 0.0018  | 0.0270557 | yes |
| gene:SpnNT_01422 | NA          | Chromosome:1462678-1463500 | 110.58 | 110.58+peptide | OK | 15.4466 | 31.4143 | 1.02413   | 1.84538  | 0.0019  | 0.0281715 | yes |
| gene:SpnNT_01758 | aroF_1      | Chromosome:1771042-1772074 | 110.58 | 110.58+peptide | OK | 287.971 | 167.96  | -0.777812 | -1.7888  | 0.00195 | 0.0288477 | yes |
| gene:SpnNT_00268 | glmS        | Chromosome:249253-251062   | 110.58 | 110.58+peptide | OK | 250.502 | 446.921 | 0.835196  | 1.85995  | 0.00205 | 0.0300896 | yes |
| gene:SpnNT_02141 | SpnNT_02141 | Chromosome:2105533-2105606 | 110.58 | 110.58+peptide | OK | 0       | 2039.46 | Inf       | NA       | 0.00205 | 0.0300896 | yes |
| gene:SpnNT_00145 | mnmA        | Chromosome:141928-143050   | 110.58 | 110.58+peptide | OK | 1157.91 | 662.917 | -0.804626 | -1.74253 | 0.0021  | 0.0307204 | yes |
| gene:SpnNT_00942 | tetM        | Chromosome:976980-978900   | 110.58 | 110.58+peptide | OK | 6.95905 | 13.7842 | 0.986055  | 1.84028  | 0.00215 | 0.0312429 | yes |
| gene:SpnNT_01045 | NA          | Chromosome:1072398-1073442 | 110.58 | 110.58+peptide | OK | 46.8885 | 83.9414 | 0.840149  | 1.77715  | 0.0022  | 0.0317584 | yes |
| gene:SpnNT_02176 | gluP        | Chromosome:2138176-2139377 | 110.58 | 110.58+peptide | OK | 256.401 | 126.177 | -1.02295  | -1.7674  | 0.0023  | 0.0329123 | yes |
| gene:SpnNT_02053 | SpnNT_02053 | Chromosome:2034521-2034605 | 110.58 | 110.58+peptide | OK | 3904    | 11667.9 | 1.57952   | 1.85765  | 0.0024  | 0.0337543 | yes |
| gene:SpnNT_00735 | lptB        | Chromosome:778928-781359   | 110.58 | 110.58+peptide | OK | 63.984  | 193.34  | 1.59536   | 1.85586  | 0.00245 | 0.0342374 | yes |
| gene:SpnNT_00797 | azr_1       | Chromosome:844932-846177   | 110.58 | 110.58+peptide | OK | 56.5963 | 101.89  | 0.848228  | 1.75868  | 0.00245 | 0.0342374 | yes |
| gene:SpnNT_02309 | SpnNT_02309 | Chromosome:2282383-2282457 | 110.58 | 110.58+peptide | OK | 0       | 1801.88 | Inf       | NA       | 0.00245 | 0.0342374 | yes |
| gene:SpnNT_01010 | lytA_6      | Chromosome:1033596-1034817 | 110.58 | 110.58+peptide | OK | 98.4461 | 52.3515 | -0.911104 | -1.73787 | 0.0025  | 0.0347143 | yes |
| gene:SpnNT_00278 | rpsG        | Chromosome:264620-265091   | 110.58 | 110.58+peptide | OK | 1680.18 | 2888.11 | 0.781509  | 1.70685  | 0.00265 | 0.0362222 | yes |
| gene:SpnNT_00568 | brnQ        | Chromosome:589460-590786   | 110.58 | 110.58+peptide | OK | 38.9221 | 70.3582 | 0.854131  | 1.73731  | 0.00265 | 0.0362222 | yes |
| gene:SpnNT_02110 | nagA        | Chromosome:2082350-2083502 | 110.58 | 110.58+peptide | OK | 146.647 | 85.0196 | -0.786483 | -1.76265 | 0.00265 | 0.0362222 | yes |
| gene:SpnNT_01716 | iga_6       | Chromosome:1717427-1723247 | 110.58 | 110.58+peptide | OK | 47.9103 | 82.1344 | 0.777649  | 1.72266  | 0.0027  | 0.0368289 | yes |
| gene:SpnNT_01941 | SpnNT_01941 | Chromosome:1942553-1942639 | 110.58 | 110.58+peptide | OK | 3218.94 | 9176.72 | 1.51139   | 1.71319  | 0.0031  | 0.0411306 | yes |
| gene:SpnNT_00088 | sorB_1      | Chromosome:79347-81608     | 110.58 | 110.58+peptide | OK | 10.7965 | 72.4926 | 2.74727   | 2.02404  | 0.0032  | 0.0422439 | yes |
| gene:SpnNT_01533 | NA          | Chromosome:1569606-1569840 | 110.58 | 110.58+peptide | OK | 60.0944 | 23.528  | -1.35285  | -1.83649 | 0.0033  | 0.0432593 | yes |
| gene:SpnNT_02030 | NA          | Chromosome:2016974-2019005 | 110.58 | 110.58+peptide | OK | 36.0865 | 20.4201 | -0.82147  | -1.75159 | 0.00335 | 0.0437836 | yes |
| gene:SpnNT_00798 | azr_2       | Chromosome:846194-846800   | 110.58 | 110.58+peptide | OK | 14.1691 | 30.4331 | 1.10289   | 1.74522  | 0.00345 | 0.0449116 | yes |
| gene:SpnNT_01818 | trxA        | Chromosome:1830818-1831133 | 110.58 | 110.58+peptide | OK | 2548.96 | 5133.57 | 1.01005   | 1.73054  | 0.00345 | 0.0449116 | yes |
| gene:SpnNT_01423 | NA          | Chromosome:1463557-1463845 | 110.58 | 110.58+peptide | OK | 12.0279 | 30.6747 | 1.35066   | 1.7699   | 0.00355 | 0.0460763 | yes |
| gene:SpnNT_01480 | punA        | Chromosome:1515677-1516487 | 110.58 | 110.58+peptide | OK | 55.1816 | 94.708  | 0.779298  | 1.63514  | 0.00365 | 0.0469562 | yes |
| gene:SpnNT_00214 | rpsC        | Chromosome:205998-206652   | 110.58 | 110.58+peptide | OK | 953.89  | 1584.25 | 0.731902  | 1.59461  | 0.0039  | 0.0495409 | yes |
