# Supplementary material for: Foreign peptide triggers boost in pneumococcal metabolism and growth
Source: PubMed Central journal article supplement (PMC5870813; doi:10.1186/s12866-018-1167-y), 2018-03-27
Supplement: 12866_2018_1167_MOESM8_ESM.pdf [file 12866_2018_1167_MOESM8_ESM.pdf]

## A

|    |                                                                                                                                                                                                                        |
|----|------------------------------------------------------------------------------------------------------------------------------------------------------------------------------------------------------------------------|
| 1  | Fasta headers                                                                                                                                                                                                          |
| 2  | pep chromosome:ASM81700v1:Chromosome:174929:175396:-1 gene:SpnNT_00179 transcript:AJD71120 gene_biotype:protein_coding transcript_biotype:protein_coding gene_symbol:ribH description:6,7-dimethyl-8-ribityllumazine s |
| 3  | pep chromosome:ASM81700v1:Chromosome:176622:177257:-1 gene:SpnNT_00181 transcript:AJD71122 gene_biotype:protein_coding transcript_biotype:protein_coding gene_symbol:ribE description:Riboflavin synthase              |
| 4  | pep chromosome:ASM81700v1:Chromosome:315132:316112:1 gene:SpnNT_00330 transcript:AJD71271 gene_biotype:protein_coding transcript_biotype:protein_coding gene_symbol:mraY description:Phospho-N-acetylmuramoyl-p        |
| 5  | pep chromosome:ASM81700v1:Chromosome:428017:428493:1 gene:SpnNT_00419 transcript:AJD71360 gene_biotype:protein_coding transcript_biotype:protein_coding gene_symbol:ilvH description:Putative acetolactate synthase    |
| 6  | pep chromosome:ASM81700v1:Chromosome:492278:493618:1 gene:SpnNT_00478 transcript:AJD71419 gene_biotype:protein_coding transcript_biotype:protein_coding gene_symbol:citS description:Sensor protein CitS               |
| 7  | pep chromosome:ASM81700v1:Chromosome:503893:504528:1 gene:SpnNT_00493 transcript:AJD71434 gene_biotype:protein_coding transcript_biotype:protein_coding gene_symbol:trmB description:tRNA (guanine-N(7)-)-methyltr     |
| 8  | pep chromosome:ASM81700v1:Chromosome:566943:568271:1 gene:SpnNT_00548 transcript:AJD71489 gene_biotype:protein_coding transcript_biotype:protein_coding gene_symbol:hssS description:Heme sensor protein HssS          |
| 9  | pep chromosome:ASM81700v1:Chromosome:773674:774231:1 gene:SpnNT_00727 transcript:AJD71668 gene_biotype:protein_coding transcript_biotype:protein_coding gene_symbol:mtrR description:HTH-type transcriptional regul    |
| 10 | pep chromosome:ASM81700v1:Chromosome:863845:864543:-1 gene:SpnNT_00822 transcript:AJD71763 gene_biotype:protein_coding transcript_biotype:protein_coding gene_symbol:yvoA description:HTH-type transcriptional repre   |
| 11 | pep chromosome:ASM81700v1:Chromosome:1064558:1066045:-1 gene:SpnNT_01038 transcript:AJD71978 gene_biotype:protein_coding transcript_biotype:protein_coding description:Polysaccharide biosynthesis protein             |
| 12 | pep chromosome:ASM81700v1:Chromosome:1342748:1343686:-1 gene:SpnNT_01305 transcript:AJD72243 gene_biotype:protein_coding transcript_biotype:protein_coding gene_symbol:pyrDB description:Dihydroorotate dehydroge      |
| 13 | pep chromosome:ASM81700v1:Chromosome:1554036:1554752:-1 gene:SpnNT_01519 transcript:AJD72453 gene_biotype:protein_coding transcript_biotype:protein_coding gene_symbol:atpB description:F-ATPase subunit 6             |
| 14 | pep chromosome:ASM81700v1:Chromosome:1608417:1611614:-1 gene:SpnNT_01578 transcript:AJD72512 gene_biotype:protein_coding transcript_biotype:protein_coding description:Phage-related protein                           |
| 15 | pep chromosome:ASM81700v1:Chromosome:1627781:1628671:-1 gene:SpnNT_01602 transcript:AJD72536 gene_biotype:protein_coding transcript_biotype:protein_coding gene_symbol:hhaIM description:Modification methylase Hh     |
| 16 | pep chromosome:ASM81700v1:Chromosome:1748867:1749970:-1 gene:SpnNT_01742 transcript:AJD72675 gene_biotype:protein_coding transcript_biotype:protein_coding gene_symbol:afr description:1,5-anhydro-D-fructose reduc    |
| 17 | pep chromosome:ASM81700v1:Chromosome:1830104:1830484:1 gene:SpnNT_01816 transcript:AJD72749 gene_biotype:protein_coding transcript_biotype:protein_coding description:accessory regulator family protein               |
| 18 | pep chromosome:ASM81700v1:Chromosome:1842906:1843973:-1 gene:SpnNT_01832 transcript:AJD72765 gene_biotype:protein_coding transcript_biotype:protein_coding description:Zn-dependent protease                           |
| 19 | pep chromosome:ASM81700v1:Chromosome:2002281:2002769:-1 gene:SpnNT_02012 transcript:AJD72921 gene_biotype:protein_coding transcript_biotype:protein_coding gene_symbol:coaD description:Phosphopantetheine adeny       |
| 20 | pep chromosome:ASM81700v1:Chromosome:2051597:2052325:-1 gene:SpnNT_02074 transcript:AJD72969 gene_biotype:protein_coding transcript_biotype:protein_coding gene_symbol:gmuR description:Glucomannan utilization p      |
| 21 | pep chromosome:ASM81700v1:Chromosome:2072531:2073361:-1 gene:SpnNT_02095 transcript:AJD72990 gene_biotype:protein_coding transcript_biotype:protein_coding gene_symbol:misCA description:Stage III sporulation prote   |
| 22 | pep chromosome:ASM81700v1:Chromosome:2148924:2149772:1 gene:SpnNT_02185 transcript:AJD73064 gene_biotype:protein_coding transcript_biotype:protein_coding gene_symbol:rlnA description:23S rRNA (guanine(745)-N(       |
| 23 | pep chromosome:ASM81700v1:Chromosome:2173434:2173625:-1 gene:SpnNT_02206 transcript:AJD73085 gene_biotype:protein_coding transcript_biotype:protein_coding description:hypothetical protein;pep chromosome:ASM817      |

|    | B                | C                    | D                                          | E                                           | F                                      |
|----|------------------|----------------------|--------------------------------------------|---------------------------------------------|----------------------------------------|
| 1  | Protein IDs      | Majority protein IDs | Student's T-test Significant ORF2_ORF2_PEP | -Log Student's T-test p-value ORF2_ORF2_PEP | Student's T-test q-value ORF2_ORF2_PEP |
| 2  | AJD71120         | AJD71120             | +                                          | 7.621646143                                 | 0                                      |
| 3  | AJD71122         | AJD71122             | +                                          | 5.823568498                                 | 0.001454545                            |
| 4  | AJD71271         | AJD71271             | +                                          | 8.81559378                                  | 0                                      |
| 5  | AJD71360         | AJD71360             | +                                          | 2.580955485                                 | 0.012                                  |
| 6  | AJD71419         | AJD71419             | +                                          | 19.27311386                                 | 0                                      |
| 7  | AJD71434         | AJD71434             | +                                          | 25.67712702                                 | 0                                      |
| 8  | AJD71489         | AJD71489             | +                                          | 18.80575571                                 | 0                                      |
| 9  | AJD71668         | AJD71668             | +                                          | 3.213852528                                 | 0.001333333                            |
| 10 | AJD71763         | AJD71763             | +                                          | 5.020457669                                 | 0.005882353                            |
| 11 | AJD71978         | AJD71978             | +                                          | 4.412128045                                 | 0.002                                  |
| 12 | AJD72243         | AJD72243             | +                                          | 6.29022879                                  | 0                                      |
| 13 | AJD72453         | AJD72453             | +                                          | 22.70182073                                 | 0                                      |
| 14 | AJD72512         | AJD72512             | +                                          | 4.254728403                                 | 0.001846154                            |
| 15 | AJD72536         | AJD72536             | +                                          | 2.202972954                                 | 0.0198                                 |
| 16 | AJD72675         | AJD72675             | +                                          | 2.170622605                                 | 0.046857143                            |
| 17 | AJD72749         | AJD72749             | +                                          | 3.249284242                                 | 0.046181818                            |
| 18 | AJD72765         | AJD72765             | +                                          | 22.39659345                                 | 0                                      |
| 19 | AJD72921         | AJD72921             | +                                          | 23.31980829                                 | 0                                      |
| 20 | AJD72969         | AJD72969             | +                                          | 4.111564695                                 | 0.0016                                 |
| 21 | AJD72990         | AJD72990             | +                                          | 3.124257146                                 | 0.016842105                            |
| 22 | AJD73064         | AJD73064             | +                                          | 4.50209757                                  | 0.0032                                 |
| 23 | AJD73085;AJD7136 | AJD73085;AJD7136     | +                                          | 4.546424644                                 | 0.003                                  |

|    | G                                         | H                                             | I               | J               | K               | L               |
|----|-------------------------------------------|-----------------------------------------------|-----------------|-----------------|-----------------|-----------------|
| 1  | Student's T-test Difference ORF2_ORF2_PEP | Student's T-test Test statistic ORF2_ORF2_PEP | TOP3 ORF2_i01_1 | TOP3 ORF2_i01_2 | TOP3 ORF2_i01_3 | TOP3 ORF2_i02_1 |
| 2  | -3.351281484                              | -4.028976131                                  | 21.26221        | 20.91191        | 20.00001        | 20.83743        |
| 3  | -1.793219037                              | -2.415698082                                  | 20.64547        | 20.99124        | 20.28038        | 20.5313         |
| 4  | -2.598408805                              | -3.648678713                                  | 20.04071        | 19.9568         | 19.86497        | 20.40018        |
| 5  | -1.626541138                              | -1.699248308                                  | 22.93956        | 21.03938        | 21.03842        | 20.42555        |
| 6  | -20.69751718                              | -24.10979423                                  | 0               | 0               | 0               | 0               |
| 7  | -22.38170666                              | -34.22597405                                  | 0               | 0               | 0               | 0               |
| 8  | 20.3950225                                | 23.23085084                                   | 20.58392        | 19.51042        | 19.29515        | 20.64356        |
| 9  | 2.545367347                               | 2.316275426                                   | 25.57217        | 22.62674        | 21.68689        | 25.52998        |
| 10 | -1.285534965                              | -1.830547631                                  | 20.43462        | 20.36823        | 19.67786        | 19.8587         |
| 11 | -1.632285436                              | -2.064375267                                  | 20.63505        | 20.75261        | 19.90307        | 19.32986        |
| 12 | -2.245675617                              | -2.882713936                                  | 20.86282        | 20.88015        | 20.5764         | 20.28341        |
| 13 | -20.94210709                              | -29.04076864                                  | 0               | 0               | 0               | 0               |
| 14 | -1.832877053                              | -2.188325595                                  | 23.11099        | 22.37976        | 23.82193        | 22.10902        |
| 15 | -1.676073922                              | -1.622514393                                  | 20.3453         | 22.68516        | 20.80452        | 21.86046        |
| 16 | -1.423506843                              | -1.486126144                                  | 20.22073        | 21.46594        | 18.58007        | 20.62705        |
| 17 | -1.1335623                                | -1.483163798                                  | 21.766          | 23.31836        | 23.2594         | 22.70138        |
| 18 | -21.30843862                              | -28.98643818                                  | 0               | 0               | 0               | 0               |
| 19 | -22.02440156                              | -30.90115502                                  | 0               | 0               | 0               | 0               |
| 20 | -2.342860964                              | -2.478749976                                  | 21.90495        | 20.46297        | 19.76974        | 20.73123        |
| 21 | -1.359483719                              | -1.642923385                                  | 20.78274        | 21.9112         | 20.82544        | 20.40085        |
| 22 | -1.52093188                               | -1.986091181                                  | 19.90229        | 19.05713        | 20.29378        | 21.06786        |
| 23 | -1.497462379                              | -1.972198241                                  | 20.49152        | 20.11032        | 20.47352        | 20.16668        |

|    | M               | N               | O               | P               | Q               | R                   | S                   | T                   |
|----|-----------------|-----------------|-----------------|-----------------|-----------------|---------------------|---------------------|---------------------|
| 1  | TOP3 ORF2_i02_2 | TOP3 ORF2_i02_3 | TOP3 ORF2_i03_1 | TOP3 ORF2_i03_2 | TOP3 ORF2_i03_3 | TOP3 ORF2_PEP_i01_1 | TOP3 ORF2_PEP_i01_2 | TOP3 ORF2_PEP_i01_3 |
| 2  | 21.1759         | 20.69763        | 20.56837        | 19.73164        | 21.51605        | 24.70163            | 23.08628            | 23.07781            |
| 3  | 19.44458        | 20.30026        | 20.81431        | 21.07155        | 19.76049        | 22.2848             | 21.56338            | 22.12217            |
| 4  | 20.45691        | 19.27262        | 19.14239        | 19.1048         | 19.75973        | 23.04501            | 22.29597            | 21.87847            |
| 5  | 21.19679        | 20.77058        | 21.89049        | 21.05119        | 21.47439        | 24.82036            | 22.21562            | 21.97519            |
| 6  | 0               | 0               | 0               | 0               | 0               | 20.16272            | 21.21923            | 19.56831            |
| 7  | 0               | 0               | 0               | 0               | 0               | 22.369              | 21.47504            | 22.37111            |
| 8  | 20.39329        | 23.14594        | 20.20133        | 20.0914         | 19.69019        | 0                   | 0                   | 0                   |
| 9  | 22.56222        | 21.6683         | 24.81669        | 22.01042        | 21.74493        | 20.55295            | 21.17634            | 20.04047            |
| 10 | 20.24907        | 19.60997        | 20.14434        | 20.11561        | 20.69857        | 21.40713            | 21.55554            | 20.58024            |
| 11 | 19.71463        | 19.92977        | 20.69649        | 20.08769        | 20.38422        | 22.74977            | 21.80082            | 20.6454             |
| 12 | 20.79523        | 20.17514        | 22.0231         | 19.64586        | 20.09724        | 23.16425            | 22.50567            | 22.6885             |
| 13 | 0               | 0               | 0               | 0               | 0               | 20.84009            | 19.96251            | 20.72988            |
| 14 | 21.99099        | 22.53742        | 23.43691        | 22.33503        | 22.42156        | 24.61073            | 25.57736            | 23.68801            |
| 15 | 19.41212        | 21.07672        | 21.32534        | 22.45631        | 19.38086        | 23.66582            | 23.40063            | 21.73561            |
| 16 | 21.04316        | 19.69403        | 20.41883        | 21.00297        | 20.45327        | 23.03074            | 21.50203            | 20.19432            |
| 17 | 21.90643        | 23.57657        | 22.25554        | 22.12054        | 23.29214        | 23.67474            | 23.6519             | 24.15561            |
| 18 | 0               | 0               | 0               | 0               | 0               | 20.42794            | 20.97754            | 21.22715            |
| 19 | 0               | 0               | 0               | 0               | 0               | 22.44934            | 21.89212            | 22.4289             |
| 20 | 19.93566        | 20.63123        | 20.53209        | 20.54969        | 20.68117        | 24.7489             | 21.90385            | 22.32419            |
| 21 | 20.30928        | 19.62101        | 20.09641        | 21.08857        | 20.7597         | 21.90344            | 22.74934            | 21.61536            |
| 22 | 19.50128        | 20.25006        | 19.83429        | 20.68702        | 19.97274        | 21.28007            | 22.08759            | 21.86572            |
| 23 | 20.51392        | 19.97644        | 20.59272        | 20.53949        | 19.74419        | 23.06993            | 21.74178            | 20.69247            |

|    | U                   | V                   | W                   | X                   | Y                   | Z                   | AA                 |
|----|---------------------|---------------------|---------------------|---------------------|---------------------|---------------------|--------------------|
| 1  | TOP3 ORF2_PEP_i02_1 | TOP3 ORF2_PEP_i02_2 | TOP3 ORF2_PEP_i02_3 | TOP3 ORF2_PEP_i03_1 | TOP3 ORF2_PEP_i03_2 | TOP3 ORF2_PEP_i03_3 | Number of proteins |
| 2  | 24.77806            | 23.36848            | 24.57532            | 25.18571            | 23.60486            | 24.48452            | 1                  |
| 3  | 22.36866            | 21.80415            | 23.11309            | 22.7459             | 22.07979            | 21.8966             | 1                  |
| 4  | 22.47831            | 22.23384            | 22.57802            | 22.72948            | 22.28413            | 21.86156            | 1                  |
| 5  | 24.13205            | 21.93895            | 22.06295            | 24.29502            | 22.92882            | 22.09625            | 1                  |
| 6  | 22.33085            | 19.73118            | 20.4189             | 22.34025            | 20.82141            | 19.6848             | 1                  |
| 7  | 23.16522            | 22.15475            | 22.34913            | 22.83736            | 22.29144            | 22.42231            | 1                  |
| 8  | 0                   | 0                   | 0                   | 0                   | 0                   | 0                   | 1                  |
| 9  | 21.33568            | 20.21396            | 21.65202            | 20.41171            | 19.98198            | 19.94492            | 1                  |
| 10 | 22.09807            | 21.37897            | 21.62964            | 22.01982            | 21.11516            | 20.9422             | 1                  |
| 11 | 22.36097            | 21.25795            | 21.49175            | 22.81864            | 21.47705            | 21.52161            | 1                  |
| 12 | 23.25886            | 22.56369            | 22.20108            | 23.68645            | 22.34458            | 23.13737            | 1                  |
| 13 | 21.15999            | 20.17243            | 21.95098            | 21.75122            | 20.64544            | 21.26641            | 1                  |
| 14 | 24.3217             | 25.93257            | 24.41601            | 24.58711            | 23.74138            | 23.76466            | 1                  |
| 15 | 24.45653            | 21.55275            | 21.91588            | 23.23449            | 22.92748            | 21.54227            | 1                  |
| 16 | 22.38723            | 20.63136            | 22.02377            | 23.12755            | 22.59486            | 20.82576            | 1                  |
| 17 | 24.05623            | 23.47815            | 24.16298            | 24.25756            | 23.08921            | 23.87205            | 1                  |
| 18 | 20.69062            | 22.2482             | 21.89672            | 22.39273            | 20.79035            | 21.12469            | 1                  |
| 19 | 22.77844            | 21.31963            | 21.71985            | 22.74498            | 21.96469            | 20.92167            | 1                  |
| 20 | 24.89775            | 22.0126             | 21.67244            | 22.9581             | 22.4581             | 23.30855            | 1                  |
| 21 | 21.38971            | 23.50537            | 21.65541            | 22.09901            | 21.07916            | 22.03374            | 1                  |
| 22 | 21.32209            | 21.10459            | 21.12588            | 22.31329            | 22.17777            | 20.97785            | 1                  |
| 23 | 21.54372            | 21.85854            | 22.36779            | 22.07933            | 20.90182            | 21.83059            | 2                  |

|    | AB       | AC                 | AD                | AE              | AF         | AG     | AH        | AI       | AJ   |
|----|----------|--------------------|-------------------|-----------------|------------|--------|-----------|----------|------|
| 1  | Peptides | Razor + unique pep | Mol. weight [kDa] | Sequence length | Q-value    | Score  | Intensity | iBAQ     | #PSM |
| 2  | 5        | 5                  | 16.766            | 155             | 0          | 231.97 | 447980000 | 49775000 | 26   |
| 3  | 3        | 3                  | 23.317            | 211             | 0.00094073 | 2.9893 | 31518000  | 2626500  | 6    |
| 4  | 2        | 2                  | 35.974            | 326             | 0          | 17.099 | 63956000  | 9136500  | 9    |
| 5  | 3        | 3                  | 17.694            | 158             | 0          | 11.908 | 136140000 | 19449000 | 10   |
| 6  | 2        | 2                  | 51.9              | 446             | 0          | 3.9473 | 33160000  | 1950600  | 9    |
| 7  | 3        | 3                  | 24.378            | 211             | 0          | 30.974 | 27736000  | 2311400  | 13   |
| 8  | 2        | 2                  | 50.485            | 442             | 0.0045788  | 2.1792 | 53057000  | 1965100  | 3    |
| 9  | 5        | 5                  | 21.727            | 185             | 0          | 8.3576 | 171710000 | 17171000 | 13   |
| 10 | 3        | 3                  | 26.829            | 232             | 0.0018692  | 2.7109 | 103260000 | 6883800  | 5    |
| 11 | 2        | 2                  | 56.53             | 495             | 0.0009434  | 3.2788 | 71024000  | 4439000  | 9    |
| 12 | 4        | 4                  | 33.142            | 312             | 0.00093545 | 2.7788 | 153300000 | 11792000 | 10   |
| 13 | 2        | 2                  | 27.208            | 238             | 0          | 24.761 | 51292000  | 17097000 | 3    |
| 14 | 7        | 7                  | 119.2             | 1065            | 0.0099728  | 1.8217 | 808730000 | 13707000 | 27   |
| 15 | 2        | 2                  | 32.988            | 296             | 0.0036799  | 2.3264 | 210670000 | 14044000 | 3    |
| 16 | 2        | 2                  | 41.144            | 367             | 0.00094429 | 3.3355 | 49606000  | 3100300  | 4    |
| 17 | 3        | 3                  | 14.612            | 126             | 0          | 5.7594 | 374010000 | 41557000 | 12   |
| 18 | 3        | 3                  | 40.231            | 355             | 0          | 11.563 | 89983000  | 6921800  | 5    |
| 19 | 2        | 2                  | 18.411            | 162             | 0.0036866  | 2.3591 | 47213000  | 5901600  | 6    |
| 20 | 5        | 5                  | 28.018            | 242             | 0          | 4.6374 | 242240000 | 22022000 | 11   |
| 21 | 2        | 2                  | 31.243            | 276             | 0          | 20.357 | 69040000  | 11507000 | 17   |
| 22 | 2        | 2                  | 32.025            | 282             | 0          | 13.854 | 28660000  | 1685900  | 16   |
| 23 | 2        | 2                  | 7.3581            | 63              | 0          | 23.557 | 79270000  | 19817000 | 6    |
